# Supplementary material for: Revival, enhancement and tuning of fluorescence from Coumarin 6: combination of host–guest chemistry, viscosity and collisional quenching
Source: Royal Society of Chemistry journal article supplement (doi:10.1039/c6ra20884c), 2016-01-01
Supplement: c6ra20884c1.pdf [file c6ra20884c1.pdf]

## Electronic Supporting information

# Revival, enhancement and tuning of fluorescence from Coumarin 6: combination of host-guest chemistry, viscosity and collisional quenching

Rajashree Banerjee, Somen Mondal and Pradipta Purkayastha\*

Department of Chemical Sciences, Indian Institute of Science Education and Research (IISER)  
Kolkata, Mohanpur 741246, WB, India

Corresponding author: ppurkayastha@iiserkol.ac.in

## Experimental Section

### Materials and Methods

Coumarin 6 and  $\beta$ -cyclodextrin were bought from Sigma-Aldrich, WI, USA and used as received. Stock solution of the dye was prepared in methanol. Final concentration ( $0.7 \times 10^{-3}$  M) of this stock solution was calculated from its absorption spectrum. Concentration of the experimental solutions, prepared in different solvents using 1% of the methanol stock, was  $1 \times 10^{-6}$  M. Double distilled water was used throughout the experiments. Other chemicals used were bought from Merck, India.

The steady state measurements were done on a Cary 300 Bio spectrophotometer from Agilent and a QM40 spectrofluorimeter from PTI. The FESEM images were recorded in Carl Zeiss SUPRA 55VP FESEM. The epifluorescence images were taken using a LSM 710 with microscope axio observer Z.1, Carl Zeiss. Steady state fluorescence anisotropy ( $r$ ) was calculated using:

$$r = (I_{VV} - GI_{VH}) / (I_{VV} + 2GI_{VH})$$

where, G factor is defined as  $G = I_{HV}/I_{HH}$ ;  $I_{VV}$  and  $I_{VH}$  represent the intensities from the excitation and emission polariser in vertical positions and vertical and horizontal positions, respectively.

### **Synthesis and Characterization of Silver Nanoparticles**

5.5 mg silver nitrate was dissolved in 10 ml of distilled water in a test tube. After dissolving  $\text{AgNO}_3$ , 5 mg of freshly prepared sodium borohydride solution was slowly added through the wall of the test tube and was vigorously shaken. Appearance of golden color indicated formation of silver nanoparticles.

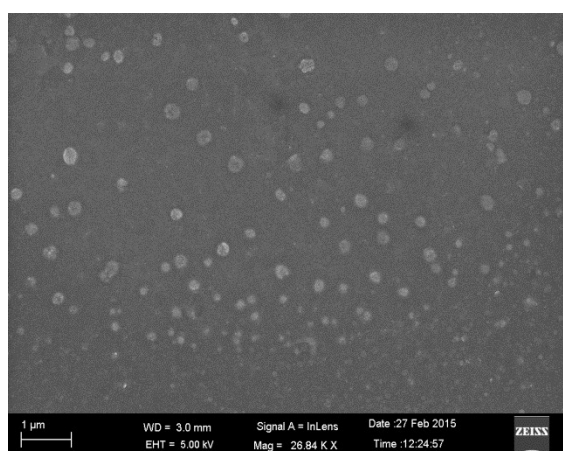

**Figure S1.** SEM image of silver nanoparticles.
